# Supplementary material
Source: PubMed Central journal article supplement (PMC5598558)
Supplement: NIHMS866609-supplement-supplement_1.pdf [file NIHMS866609-supplement-supplement_1.pdf]

|                                           | Weighted % | aOR   | CI        | p       |
|-------------------------------------------|------------|-------|-----------|---------|
| <b>Pain</b>                               |            |       |           |         |
| No                                        | 8.1        | (ref) |           |         |
| Yes                                       | 21.3       | 2.39  | 1.96-2.91 | <.0001  |
| <b>Age</b>                                |            |       |           |         |
| 4-6                                       | 7.7        | (ref) |           |         |
| 7-11                                      | 10.2       | 0.96  | 0.75-1.24 | 0.8     |
| 12-17                                     | 14.6       | 1.32  | 1.01-1.73 | 0.04    |
| <b>Sex</b>                                |            |       |           |         |
| Male                                      | 9.8        | (ref) |           |         |
| Female                                    | 13.5       | 1.5   | 1.27-1.78 | <.0001  |
| <b>Race/Ethnicity</b>                     |            |       |           |         |
| White                                     | 15         | (ref) |           |         |
| Black                                     | 5.4        | 0.58  | 0.41-0.81 | 0.001   |
| Hispanic                                  | 6.4        | 0.63  | 0.48-0.81 | <0.0001 |
| Other                                     | 14         | 0.98  | 0.73-1.32 | 0.89    |
| <b>Income</b>                             |            |       |           |         |
| \$0 - \$34,999                            | 6.5        | (ref) |           |         |
| \$35,000 - \$74,999                       | 10.6       | 1.28  | 0.99-1.66 | 0.06    |
| \$75,000 - \$99,999                       | 13.8       | 1.39  | 1.02-1.89 | 0.037   |
| \$100,000 and over                        | 18         | 1.59  | 1.19-2.15 | 0.002   |
| <b>Insurance Status</b>                   |            |       |           |         |
| Uninsured                                 | 7.8        | (ref) |           |         |
| Any private                               | 14.8       | 0.99  | 0.66-1.48 | 0.97    |
| Public only                               | 7.5        | 0.86  | 0.57-1.29 | 0.47    |
| <b>Parental education</b>                 |            |       |           |         |
| Bachelor's or higher                      | 17.5       | (ref) |           |         |
| Some college                              | 11         | 0.62  | 0.49-0.77 | <0.0001 |
| HS or less                                | 5.1        | 0.36  | 0.25-0.52 | <0.0001 |
| <b>Region</b>                             |            |       |           |         |
| Northeast                                 | 10.9       | (ref) |           |         |
| Midwest                                   | 14.2       | 1.31  | 0.93-1.84 | 0.12    |
| South                                     | 7.9        | 0.79  | 0.57-1.09 | 0.14    |
| West                                      | 15.4       | 1.88  | 1.35-2.64 | <.0001  |
| <b>Comorbidities</b>                      |            |       |           |         |
| 0                                         | 8.2        | (ref) |           |         |
| 1                                         | 12.4       | 1.3   | 1.06-1.60 | 0.014   |
| 2-3                                       | 16         | 1.75  | 1.37-2.25 | <0.0001 |
| 4+                                        | 24         | 2.82  | 2.00-3.97 | <0.0001 |
| <b>Has a personal healthcare provider</b> |            |       |           |         |
| Yes                                       | 8.3        | (ref) |           |         |
| No                                        | 12.4       | 1.2   | 0.91-1.60 | 0.2     |

aOR: adjusted Odds Ratio; CI: 95% Confidence Interval.

Supplemental Table A. Multivariate logistic regression analysis (adjusting for predisposing, enabling, and need factors) estimating the association between CAM use and sample sociodemographic and clinical characteristics.
